1 **SILAC-Based Quantitative Proteomics Identifies Multifactorial**  
2 **Mechanism of Oxaliplatin Resistance in Pancreatic Cancer Cells**

3

4 Young Eun Kim<sup>1,2,§</sup>, Eun-Kyung Kim<sup>3, §</sup>, Min-Jeong Song<sup>3</sup>, Tae-Young Kim<sup>2</sup>, Ho Hee Jang<sup>3,\*</sup>  
5 Dukjin Kang<sup>1,\*</sup>

6 <sup>1</sup>Center for Bioanalysis, Division of Chemical and Medical Metrology, Korea Research  
7 Institute of Standards and Science, Daejeon 34113, Republic of Korea

8 <sup>2</sup>School of Earth Sciences and Environmental Engineering, Gwangju Institute of Science and  
9 Technology, Gwangju 61005, Republic of Korea

10 <sup>3</sup>Department of Biochemistry, College of Medicine, Gachon University, Incheon 21999,  
11 Republic of Korea

12

13

14 <sup>§</sup>Both authors contributed equally to this study

15

16 \*Corresponding author: **Dukjin Kang**, Phone: +82-42-868-5700, Fax: +82-42-868-5801, E-  
17 mail: [djkang@kriss.re.kr](mailto:djkang@kriss.re.kr), and **Ho Hee Jang**, Phone: +82-32-899-6317, Fax: +82-32-899-  
18 6318, E-mail: [hhjang@gachon.ac.kr](mailto:hhjang@gachon.ac.kr)

19

20

21 **Running title:** Proteomic profiling of oxaliplatin-resistant PANC-1 cells

22

## 23 **Abbreviations**

24 SILAC, stable isotope labelling by amino acids in cell culture

25 2D-nLC-MS/MS, two-dimensional nanoflow liquid chromatography-tandem mass  
26 spectrometry

27 PPI, protein-protein interaction

28 MARCKS, myristoylated alanine-rich C-kinase substrate

29 WLS, wntless homolog protein

30 PI3K/AKT, phosphatidylinositol 3-kinase/protein kinase B

31 qRT-PCR, real-time quantitative reverse transcription-PCR

32 siRNA, short interfering RNA

33

34 **Keywords:** quantitative proteomics, SILAC, pancreatic cancer, drug resistance, oxaliplatin

35

36

## 37 **Abstract**

38 Oxaliplatin is a commonly used chemotherapeutic drug for the treatment of pancreatic cancer.  
39 Understanding the cellular mechanisms of oxaliplatin resistance is important for developing  
40 new strategies to overcome drug resistance in pancreatic cancer. In this study, we performed a  
41 stable isotope labelling by amino acids in cell culture (SILAC)-based quantitative proteomic  
42 analysis of oxaliplatin-resistant and sensitive pancreatic cancer PANC-1 cells. We identified  
43 107 proteins whose expression levels changed between oxaliplatin-resistant and sensitive  
44 cells, which were involved in multiple biological processes, including DNA repair, drug  
45 response, apoptotic signalling, and the type 1 interferon signalling pathway. Notably,  
46 myristoylated alanine-rich C-kinase substrate (MARCKS) and wntless homolog protein  
47 (WLS) were upregulated in oxaliplatin-resistant cells compared to sensitive cells, as  
48 confirmed by qRT-PCR and Western blot analysis. We further demonstrated the activation of  
49 AKT and  $\beta$ -catenin signalling (downstream targets of MARCKS and WLS, respectively) in  
50 oxaliplatin-resistant PANC-1 cells. Additionally, we show that the siRNA-mediated  
51 suppression of both MARCKS and WLS enhanced oxaliplatin sensitivity in oxaliplatin-  
52 resistant PANC-1 cells. Taken together, our results provide insights into multiple mechanisms  
53 of oxaliplatin resistance in pancreatic cancer cells and reveal that MARCKS and WLS might  
54 be involved in the chemotherapeutic resistance in pancreatic cancer.

## 55 **Introduction**

56 Pancreatic cancer is one of the most lethal cancers, with the five-year survival rate of 8%, the  
57 lowest survival rate among other common types of cancer (1). Despite recent advances in  
58 cancer therapeutics, pancreatic cancer still has a poor prognosis, mainly due to a lack of its  
59 distinctive symptoms in early stages. In addition, either the spread of pancreatic cancer to

60 other organs in the abdomen or its chemoresistance during chemotherapy can occur readily in  
61 early stages (2, 3).

62 Oxaliplatin is a platinum-based chemotherapy drug used in the treatment of various  
63 types of cancers, including pancreatic, colorectal, and gastric cancers (4-6). The combination  
64 of oxaliplatin with other chemotherapy drugs (5-FU, leucovorin, and irinotecan) is one of the  
65 standard regimens in first-line treatment for pancreatic cancer (7). Similar to other platinum  
66 drugs, oxaliplatin is known to cause DNA damage by the formation of platinum-DNA  
67 adducts, resulting in cell toxicity and death (8, 9). Although the use of oxaliplatin is effective  
68 in the treatment of cancers, acquired resistance to oxaliplatin often occurs in patients, which  
69 leads to therapeutic failures. Many studies have reported the several different mechanisms of  
70 resistance to oxaliplatin in the acquired oxaliplatin-resistant cancer cell lines (9-12), which  
71 include the regulation of cellular transport and detoxification (10), the enhancement of DNA  
72 repair system (12), and the activation of NF- $\kappa$ B signalling (11). However, understanding of  
73 multiple mechanisms for acquired oxaliplatin resistance remains a challenge in pancreatic  
74 cancer treatments.

75 Mass spectrometry-based proteomics has become a powerful tool to explore  
76 multiple mechanisms of chemoresistance in cancer cells, which allows the global  
77 identification and quantification of proteins associated with drug resistance (13-15). For  
78 example, an earlier study has reported the comparative proteomic profiling between  
79 oxaliplatin sensitive and resistant human colorectal cancer cells (15). These authors detected  
80 down-regulation of pyruvate kinase M2 (PK-M2) in oxaliplatin resistant cells and further  
81 demonstrated an inverse relationship between PK-M2 expression and oxaliplatin resistance in  
82 patients with colorectal cancer.

83 The aim of this study is to investigate the global proteomic changes associated with

84 acquired oxaliplatin resistance in pancreatic cancer cells. We established oxaliplatin-resistant  
85 PANC-1 cells by stepwise exposure to increasing concentration of oxaliplatin. A stable  
86 isotope labelling by amino acids in cell culture (SILAC)-based quantitative proteomics  
87 analysis of oxaliplatin sensitive and resistant PANC-1 (PANC-1R) cells was performed using  
88 two-dimensional nanoflow liquid chromatography-tandem mass spectrometry (2D-nLC-  
89 MS/MS). A number of proteins involved in DNA repair, drug response, apoptosis signalling,  
90 and type 1 interferon signalling pathway were significantly changed in PANC-1R cells  
91 compared to sensitive cells. Also, we identified myristoylated alanine-rich C-kinase substrate  
92 (MARCKS) and wntless homolog protein (WLS) as highly upregulated proteins in PANC-1  
93 R cells, and validated these using qRT-PCR and Western blotting. Finally, we then explored  
94 the roles of MARCKS and WLS in oxaliplatin resistance using siRNA silencing.

95

## 96 **Experimental procedures**

### 97 **Experimental Design and Statistical Rationale**

98 To perform quantitative proteomic analysis, the human pancreatic cancer PANC-1 cells and  
99 oxaliplatin-resistant PANC-1 (PANC-1R) cells were metabolically labelled with the heavy  
100 amino acids ( $^{13}\text{C}_6$ -Arg and  $^{15}\text{N}_2^{13}\text{C}_6$ -Lys) for SILAC-Heavy and their light counterparts ( $^{12}\text{C}_6$ -  
101 Arg and  $^{14}\text{N}_2^{12}\text{C}_6$ -Lys) for SILAC-Light, respectively. SILAC-labelled PANC-1 (heavy) and  
102 PANC-1R (light) cells were used for proteomic analysis. The proteomic dataset was obtained  
103 from three biological replicates with two technical replicates using on-line 2D-LC-MS/MS. A  
104 total of six datasets were obtained, each consisting of 12 MS raw data files. MS raw data  
105 were processed using MaxQuant search engine 1.6.1.0. To perform appropriate statistical  
106 analysis, we considered only proteins that were quantified at least three times in six datasets.

107 Student's t-test was performed using the Perseus software 1.5.8.5. P-values less than 0.05  
108 were considered statistically significant. All data showed a normal distribution and linear  
109 correlation between replicates (see Result section). For a detailed description of MS data  
110 processing and statistical analysis, see the data analysis in the experimental procedures  
111 sections.

112

### 113 **Establishment of an Oxaliplatin-Resistant Pancreatic Cancer Cell Line**

114 The human pancreatic cancer cell line, PANC-1, was obtained from the Korean Cell Lines  
115 Bank (KCLB, Seoul, Korea) and cultured in Dulbecco's Modified Eagle's Medium (DMEM,  
116 Capricorn Scientific GmbH, Germany) with 100 units/mL penicillin, 100 µg/mL  
117 streptomycin, and 10% fetal bovine serum (FBS) at 37°C with 5% CO<sub>2</sub> in a humidified  
118 atmosphere. Anticancer-drug resistant PANC-1 cells were established by means of increasing  
119 concentrations of oxaliplatin, as previously described (16857785, 27910856, 23349823).  
120 Oxaliplatin (O9512) was purchased from Sigma-Aldrich. To establish a stable pancreatic  
121 cancer cell line chronically resistant to oxaliplatin, the PANC-1 cells were cultured at a  
122 starting concentration of 20 µg/ml oxaliplatin for 48 h. When the surviving population of  
123 PANC-1 cells became 80% confluent, the cells were sub-cultured twice. The concentration of  
124 oxaliplatin in the surviving PANC-1 cells was exposed to a stepwise increase in the same  
125 manner to 40 µg/ml, and finally to a concentration of 80 µg/ml. The surviving PANC-1 cells  
126 with final treatment of oxaliplatin was named PANC-1R. The sensitivity of parental PANC-1  
127 and oxaliplatin-resistant PANC-1R cells to oxaliplatin was determined by cell viability assay  
128 analyzed by treatment for 48 h with different concentrations of oxaliplatin.

129

### 130 **Cell Viability Assay**

131 Cells were seeded in 96-well plates at a density of  $1 \times 10^4$  cells/well. Oxaliplatin was treated  
132 for 48 h at 37°C with 5% CO<sub>2</sub> in a humidified atmosphere. of Ez-cytox (10 µl/well, Dogen  
133 bio, Seoul, South Korea) was incubated at 37°C for 3 h. To measure the number of viable  
134 cells, the absorbance of each well was detected at 450 nm using an Epoch-2 microplate reader  
135 (BioTek, Winooski, VT, USA). The assays were performed in triplicate.

136

### 137 **Colony Forming Assay**

138 Equal numbers of PANC-1 or PANC-1R cells (1,000/well) were seeded into 6-well plates and  
139 cultured for 2 weeks in the medium. After washing with phosphate-buffered saline (PBS), the  
140 cells were fixed with 4% paraformaldehyde for 30 min and stained with 0.1% crystal violet  
141 (C0775, Sigma-Aldrich) for 30 min at room temperature. The number of colonies was  
142 counted under a light microscope.

143

### 144 **Stable Isotope Labelling with Amino Acids in Cell Culture (SILAC)**

145 PANC-1 cells were cultured in SILAC DMEM medium (Welgene, Daegu, Korea) with  
146 dialyzed FBS (Gibco, USA) containing heavy 0.798 mM lysine and 0.398 mM arginine.  
147 Heavy lysine (1G: CLM-265-H-1) and arginine (1G: CNLM-291-H-1) were purchased from  
148 Cambridge Isotope Laboratories (CIL, USA). PANC-1R cells were grown in light SILAC  
149 growth medium (DMEM, Capricorn Scientific GmbH, Germany) with dialyzed FBS (Gibco,  
150 USA). All cells were maintained at 37°C in humidified air containing 5% CO<sub>2</sub>. To validate  
151 labelling efficiency for full incorporation of heavy amino acid labels in all proteins, cells  
152 were cultured for seven passages and checked reached > 95% by LC-MS/MS analysis.

153

## 154 **Sample Preparation for Proteomic Analysis**

155 PANC-1 and PANC-1R cells were suspended with cell lysis buffer (8 M urea, 50 mM Tris-  
156 HCl pH 8.0, 75 mM NaCl, and a cocktail of protease inhibitors) and sonicated with ten 3-s  
157 pulses (2-s pause between pulses). The lysate was centrifuged for 15 min at 12000 rpm, and  
158 the supernatant was collected for proteomic sample preparation. Protein concentrations were  
159 measured using a bicinchoninic acid (BCA) assay. An equal amount of proteins from PANC-  
160 1 and PANC-1R cells were mixed and followed by being reduced with 10 mM dithiothreitol  
161 (DTT) for 2 h at 37°C and alkylated with 20 mM iodoacetamide (IAA) for 30 min at room  
162 temperature in the dark. The remaining IAA was quenched by the addition of excess L-  
163 cysteine. Samples were diluted with 50 mM ammonium bicarbonate buffer to a final  
164 concentration of 1 M urea and then digested with trypsin (1:50, w/w) for 18 h at 37°C. To  
165 stop the digestion, 1% formic acid (FA) was added, and the resulting peptide mixtures were  
166 desalted with a 10 mg OASIS HLB cartridge (Waters, MA, USA). The eluted peptides were  
167 dried in a vacuum concentrator and reconstituted in 0.1% FA.

168

## 169 **Liquid Chromatography-Tandem Mass Spectrometry (LC-MS/MS) Analysis**

170 On-line 2D-nLC-MS/MS analysis was performed with a capillary LC system (Agilent  
171 Technologies, Waldbronn, Germany) coupled to a Q-Exactive<sup>TM</sup> hybrid quadrupole-Orbitrap  
172 mass spectrometer (Thermo Fisher Scientific). For on-line 2D-nLC, biphasic reverse phase  
173 (RP)/strong cation exchange (SCX) trap columns were packed in one-end tapered capillary  
174 tubing (360 µm-O.D., 200 µm-I.D., 40 mm in length) with 5 mm of C18 resin (5 µm-200 Å)  
175 followed by 15 mm of SCX resin (5 µm-200 Å), as previously described (16). The RP  
176 analytical column was packed in 150 mm capillary (360 µm-O.D., 75 µm-I.D.) with C18  
177 resin (3 µm-100 Å).



178 The peptides were injected into the trap column and fractionated with 12-step salt  
179 gradients (0, 15, 20, 22.5, 25, 27.5, 30, 40, 50, 100, 200, and 1000 mM ammonium  
180 bicarbonate buffer containing 0.1% FA). The peptides eluted from SCX resin at each salt step  
181 were moved on to the RP resin of the trap column, followed by 120 min RP gradients at a  
182 column flow rate 200 nL/min. The mobile phase consisted of buffer A (0.1% FA in water)  
183 and B (2% water and 0.1% FA in acetonitrile). The gradient was 2% B for 10 min, 2–10% B  
184 for 1 min, 10–17% B for 4 min, 17–33% B for 70 min, 33–90% B for 3 min, 90% B for 15  
185 min, and 90–2% B for 2 min and 2% B for 15 min.

186 The Q-Exactive mass spectrometer was operated in data-dependent mode. Full-scan  
187 MS spectra ( $m/z$  300–1800) were acquired with automatic gain control (AGC) target value of  
188 3E6 at a resolution of 70,000. MS/MS spectra were obtained at a resolution of 35,000. The  
189 top 12 most abundant ions from the MS scan were selected for high-energy collision  
190 dissociation (HCD) fragmentation with normalized collision energy (NCE) of 27%. Precursor  
191 ions with single and unassigned charge state were excluded. Dynamic exclusion was set to 30  
192 s. Each biological replicate was analyzed in technical duplicate 2D LC runs.

193

## 194 **Data Analysis**

195 The MS raw data files were searched against the UniProt human database (Jan 3, 2018  
196 release) using MaxQuant software (version 1.6.1.0) integrated with the Andromeda search  
197 engine for protein identification and SILAC quantification (17). The search criteria were set  
198 as follows: two mis-cleavages were allowed; the mass tolerance was 4.5 ppm and 20 ppm for  
199 precursor and fragment ions, respectively; carbamidomethylation of cysteine (C) was set as a  
200 fixed modification; oxidation of methionine (M) and acetylation of N-terminal residue was  
201 set as variable modifications; the false discovery rate (FDR) was set to 0.01 for both peptides

202 and proteins; SILAC heavy label was set to Arg6 and Lys8. Only proteins were identified  
203 with at least two unique peptides per protein. All contaminants and reverse database hits were  
204 excluded from the protein list. Subsequent data processing and statistical analysis were  
205 performed using the Perseus software 1.5.8.5 (18). The SILAC light/heavy ratios were  $\log_2$   
206 transformed and normalized by subtracting the median. To identify a significant difference  
207 between PANC-1 and PANC-1R cells, the Student's t-test was applied. A functional Gene  
208 Ontology (GO) enrichment analysis was performed using DAVID. The enrichment analysis  
209 of the reactome pathway was performed using the R/Bioconductor package ReactomePA  
210 (version 1.30.0) (19). A protein-protein interaction (PPI) network was constructed (high  
211 confidence score,  $> 0.7$ ) with the Search Tool for the Retrieval of Interacting Genes/Proteins  
212 (STRING) 11.0 and then visualized using Cytoscape software 3.7.1. Network module  
213 analysis was performed using the Molecular Complex Deletion (MCODE) plugin for  
214 Cytoscape. The parameters were set as degree cut-off = 2, node score cutoff = 0.2, k-core = 2,  
215 and maximum depth = 100.

216

### 217 **Western Blot Analysis**

218 Harvested cells were lysed in cold radioimmunoprecipitation assay (RIPA) lysis buffer [0.5  
219 M Tris-HCl (pH 7.4) 1.5 M NaCl, 2.5% deoxycholic acid, 10% NP-40, 10 mM EDTA] with  
220 protease and phosphatase inhibitors (Gendepot, Katy, TX, USA). Cell lysates were analyzed  
221 by sodium dodecyl sulfate-polyacrylamide gel electrophoresis (SDS-PAGE) and transferred  
222 to nitrocellulose membranes (GE Healthcare). After blocking with 8% skim milk or 5%  
223 bovine serum albumin (BSA) for 30 min, the membrane was probed with primary antibodies  
224 overnight at 4°C. After washing with phosphate-buffered saline (PBS)/1% Tween-20 (T-  
225 PBS), the membrane was developed with a peroxidase-conjugated secondary antibody from

226 Merck Millipore, and immunoreactive proteins were visualized using enhanced  
227 chemiluminescence reagents (Amersham Biosciences, Piscataway, NJ), as recommended by  
228 the manufacturer.

229 Primary antibodies were used for ISG15 (#2758), MARCKS (#5607), p-Akt (Ser473)  
230 (#9271), Akt (#9272),  $\beta$ -catenin (#9562), and cyclin D1 (#2978) from Cell Signaling  
231 Technology (CST, Beverly, MA). Primary antibodies were used for p53 (sc-126), IFIT3 (sc-  
232 393512), GAPDH (sc-47724), and HO-1 (sc-136960) from Santa Cruz Biotechnology (Santa  
233 Cruz, CA, USA). Anti-SOD2 (LF-PA0214) was obtained from Young In frontier (Seoul,  
234 Korea). Anti- $\beta$ -actin (MAB1501) was obtained from Merck Millipore. Anti-WLS (655902  
235 was obtained from Biolegend (San Diego, CA, USA).

236

### 237 **RNA Isolation and qRT-PCR**

238 Total RNA was purified using a TRIzol reagent (Ambion, Life Technologies, Carlsbad, CA,  
239 USA). 1 $\mu$ g of total RNA was synthesized to cDNA using a Prime Script<sup>TM</sup> 1st strand cDNA  
240 synthesis (TaKaRa, Japan). For analysis of relative quantitation, qRT-PCR reactions were  
241 subjected using TaKaRa SYBR Premix Ex Taq II (TaKaRa, Japan), and PCR processing was  
242 carried out in an iCycler (Bio-Rad, Hercules, CA). The sequences of primers for human  
243 *MARCKS* were 5'-CCAGTTCTCCAAGACCGCAG-3' (sense) and 5'-TCTCCTGTCCGT  
244 TCGCTTTG-3' (antisense). The sequences of primers for human *WLS* were 5'-  
245 GCACCAAGAAGCTGTGCATT-3' (sense) and 5'-GTTGTGGGCCCAATCAAGCC-3'  
246 (antisense). The sequences of primers for *GAPDH* were 5'-  
247 TCGACAGTCAGCCGCATCTTCTTT-3' (sense) and 5'-  
248 ACCAAATCCGTTGACTCCGACCTT-3' (antisense). The copy number of these genes was  
249 normalized to an endogenous reference gene, *GAPDH*. The fold change from PANC-1 was

250 set at 1-fold, and then the normalized fold change ratio was calculated. Data of relative gene  
251 expression was calculated by  $2^{-\Delta\Delta CT}$  method (20).

252

### 253 **siRNA Transfection**

254 For knockdown of MARCKS or WLS, the transfection was performed with 20 nM siRNA  
255 using Lipofectamine 2000 (Invitrogen, Carlsbad, CA) according to the manufacturer's  
256 protocol. si-MARCKS (sc-35857) and si-WLS (sc-88713) were purchased from Santa Cruz  
257 Biotechnology (Santa Cruz, CA, USA).

258

### 259 **Statistical analysis**

260 All experiments were conducted in triplicate, and the mean values  $\pm$  standard deviation (SD)  
261 values were presented. Comparisons between the two groups were considered using the  
262 Student's t-test. Differences between data groups were deemed statistically significant at  $P <$   
263 0.05.

264

## 265 **Results**

### 266 **The Establishment and Validation of Oxaliplatin-Resistant PANC-1 cells**

267 The human pancreatic cell line PANC-1 was subjected to gradually increasing concentrations  
268 of anticancer-drug. To examine the acquired drug resistance of PANC-1 cells, drug sensitivity  
269 to oxaliplatin was measured in parental and drug-resistant cells using a cell viability assay.

270 The cell viability of parental PANC-1 cells was decreased depending on the concentration of  
271 oxaliplatin, whereas the oxaliplatin-resistant PANC-1 (PANC-1R) cells showed a high cell  
272 survival rate, even at high concentrations of oxaliplatin (Fig. 1A). To examine the potential of

273 tumorigenesis in oxaliplatin-resistant PANC-1R cells, we performed colony foramina assay.  
274 The colony-forming ability of PANC-1R cells was increased relative to the parental PANC-1  
275 cells (Fig. 1B). These results indicate that PANC-1R cells exhibit the acquired chemoresistant  
276 features for oxaliplatin.

277

### 278 **Quantitative Proteomic Analysis of Oxaliplatin Resistant and Sensitive PANC-1 Cells**

279 To study changes in protein expression associated with oxaliplatin resistance in PANC-1  
280 cells, SILAC-based quantitative proteomic analysis was performed using on-line 2D nLC-  
281 MS/MS. To this end, PANC-1 cells were metabolically labelled with two “heavy” isotope  
282 amino acids ( $^{13}\text{C}_6$ -Arg and  $^{15}\text{N}_2^{13}\text{C}_6$ -Lys), while PANC-1R cells were cultured with their  
283 “light” amino acid counterparts ( $^{12}\text{C}_6$ -Arg and  $^{14}\text{N}_2^{12}\text{C}_6$ -Lys) (Fig. 2A). Equal amount of  
284 PANC-1R (light) and PANC-1 (heavy) cell lysates were combined, followed by tryptic  
285 digestion and on-line 2D nLC-MS/MS analysis. Quality assessments of the proteomic dataset  
286 are shown in Figure 2B, and Supplemental Figure S1. There are linear correlations between  
287 biological replicates with *R* squared values ranging from 0.797 to 0.877 (Fig. 2B), indicating  
288 good reproducibility. Histograms of normalized  $\log_2$  (light/heavy) were normally distributed  
289 (Supplemental Figure S1).

290 A total of 3544 proteins were commonly quantified in both PANC-1 and PANC-1R  
291 cells, considering only proteins that were quantified in at least three of the six replicates  
292 (Supplemental Table S1). Among these, 107 proteins were significantly changed between  
293 PANC-1 and PANC-1 R cells with thresholds of 2-fold changes and p-value 0.05 (Fig. 2C).  
294 Compared with oxaliplatin sensitive PANC-1 cells, 54 proteins were upregulated, and 53  
295 proteins were downregulated in PANC-1R cells (Supplemental Tables S2 and S3). To gain  
296 more insight into the biological functions of significantly changed proteins, GO enrichment

297 analysis was performed using DAVID. All enriched GO terms, including biological processes  
298 and molecular functions, are shown in Supplementary Table S4. The upregulated proteins  
299 were mostly involved in base-excision repair (GO:0006284), cell-cell adhesion  
300 (GO:0098609), and cellular response to the drug (GO:0035690), and the downregulated  
301 proteins in type 1 interferon signalling pathway (GO:0060337), intrinsic apoptosis signalling  
302 pathway in response to DNA damage (GO:0008630), and positive regulation of apoptotic  
303 process (GO:0043065) (Fig. 2D). The reactome pathway analysis also revealed that  
304 downregulated proteins were significantly enriched in interferon signalling, interferon-  
305 alpha/beta signalling and DDX58/IFIH1-mediated induction of interferon-alpha/beta  
306 signalling (Fig. 3). However, there was no significant enrichment of the reactome pathway  
307 for upregulated proteins.

308 We further constructed the PPI network for 107 significantly changed proteins between  
309 PANC-1 and PANC-1R cells using the STRING database and mapped with Cytoscape. After  
310 excluding the disconnected proteins in the interaction networks (confidence score, > 0.7), 50  
311 proteins were mapped in the PPI network (Fig. 4). Based on the MCODE analysis of PPI  
312 network in Cytoscape, the most significant module (MCODE score = 9) consisted of nine  
313 nodes (IFIT1, IFIT2, IFIT3, IFIH1, ISG15, OASL, DDX58, DDX60 and HERC5) with 36  
314 edges, which were functionally associated with Type 1 interferon signalling pathway. Other  
315 molecules were implicated in protein ubiquitination, neutrophil degranulation, and protein  
316 hydroxylation (each MCODE score = 3).

317

### 318 **Verification of Differentially Expressed Proteins between Oxaliplatin Sensitive and** 319 **Resistant PANC-1 Cells by Western Blot.**

320 To verify quantitative proteomics datasets, Western blotting was performed for six

321 significantly changed proteins that are cellular tumour antigen p53 (p53), G2/mitotic-specific  
322 cyclin-B1 (Cyclin B1), superoxide dismutase (SOD2), interferon-induced protein with  
323 tetratricopeptide repeats 3 (IFIT3), ubiquitin-like protein ISG15 (ISG15), and heme  
324 oxygenase 1 (HO-1). From the Western blot assays, resultingly, the changes in expression  
325 levels – two (p53 and Cyclin B1) and four (SOD2, IFIT3, ISG15, and HO-1) proteins were  
326 upregulated and downregulated in PANC-1R cells, respectively, compared to those  
327 counterpart proteins in PANC-1 cells – were consistent with their quantitative proteomic  
328 results (Figs. 5A and B).

329

### 330 **MARCKS or WLS was a Significant Factor for Chemoresistant in PANC-1R Cells**

331 On the basis of upregulated proteins in PANC-1R cells, we hypothesized that fundamental  
332 factors, which is highly expressed in PANC-1R cells, can induce tolerance to oxaliplatin in  
333 cancer cells. MARCKS was highly expressed in PANC-1 R cells (Supplemental Table S2).  
334 MARCKS is involved in transducing receptor-mediated signals into intracellular kinases,  
335 such as Akt and PKC (21-23). The SILAC ratio of MARCKS protein expression level was 6-  
336 fold higher in PANC-1R cells compared to PANC-1 cells (Fig. 6A). The mRNA level of  
337 MARCKS measured by qRT-PCR was also 6-fold higher in PANC-1R cells compared to  
338 PANC-1 cells (Fig. 6B). To confirm the protein level and activity of MARKCS, we examined  
339 the levels of MARCKS and its downstream protein using Western blot analysis. We found  
340 that the protein levels of MARCK and AKT phosphorylation were increased in PANC-1 R  
341 cells (Fig. 6C).

342 Wntless homolog protein (WLS, Evi or GPR177) was also detected to be highly  
343 expressed in PANC-1R cells (Supplemental Table S2), and WLS regulates the sorting and  
344 secretion of wnt proteins (24). The SILAC ratio of WLS protein expression level was 4-fold

345 higher in PANC-1R cells compared to PANC-1 cells (Fig. 6D). The mRNA level of WLS is  
346 also elevated in PANC-1R cells (Fig. 6E). WLS is essential for  $\beta$ -catenin signalling (25, 26).  
347 To check the activity of WLS, we examined the level of  $\beta$ -catenin and its target cyclin D1  
348 (27, 28). Up-regulation of WLS in PANC-1R cells increased the expression of  $\beta$ -catenin and  
349 cyclin D1 (Fig. 6F).

350

### 351 **Inhibition of MARCKS and WLS Increased Oxaliplatin-mediated Cell Death in** 352 **Chemoresistant PANC-1R Cells**

353 Next, we explored whether down-regulation of MARCKS and WLS in PANC-1R cells  
354 affects cell survival for oxaliplatin treatment. When silencing in PANC-1R cells using siRNA  
355 specific for MARCKS or WLS, cell viability to oxaliplatin was slightly decreased compared  
356 to PANC-1R control cells (siCon) (Figs. 7A and B). However, when silencing both MARCKS  
357 and WLS at the same time, the decrease in cell viability was significantly reduced compared  
358 to single gene silencing (Figs. 7C and D). These results indicated that drug resistance in  
359 PANC-1 R cells was regulated by the association of several factors rather than by a single  
360 factor.

361

### 362 **Discussion**

363 To understand the mechanism of oxaliplatin resistant in pancreatic cancer cells, we  
364 successfully established oxaliplatin resistant pancreatic cancer PNAC-1 cell lines by a  
365 stepwise increase of oxaliplatin concentration in a culture medium. Using SILAC-based 2D-  
366 nLC-MS/MS, the quantitative proteomic analysis was performed across PANC-1R and  
367 PANC-1 cells. We identified a number of significantly changed proteins in oxaliplatin  
368 resistant cells compared with sensitive cells, which were associated to multiple biological



369 processes, including DNA repair system, cellular response to drug, apoptotic signalling and  
370 type 1 interferon signalling pathway.

371 We identified the up-regulation of base-excision repair in PANC-1R cells compared to  
372 PANC-1 cells (Fig. 2D and Supplemental Table S3). Base-excision repair is one of the major  
373 DNA repair systems for oxidative DNA damages, which is a known pathway involved in  
374 resistance to oxaliplatin (12, 29). Because oxaliplatin induces the formation of free radicals as  
375 well as oxaliplatin-DNA adducts, exposure to oxaliplatin causes oxidative DNA damages and  
376 subsequently cytotoxicity (10, 30). Therefore, an increase of base-excision repair capacity  
377 could contribute the resistance to oxaliplatin-induced cytotoxicity. In agreement with this, the  
378 down-regulation of the apoptotic pathway in response to DNA damage was identified in  
379 PANC-1R cells (Fig. 2D and Supplemental Table S3).

380 Our study also identified type 1 interferon signalling-related proteins (IFIT1, IFIT2,  
381 IFIT3, OASL and ISG15) that were down-regulated in PANC-1R cells (Figs. 2D and 3), and  
382 further confirmed the expression level of IFIT3 and ISG15 by Western blot (Fig. 5B). So far,  
383 little is known about the role of type 1 interferon signalling in resistance to platinum drugs.  
384 Huo et al. reported that silencing of ISG15 increased cisplatin resistance in colorectal cancer  
385 A549 cells by the increase of p53 stability (31), which is consistent with our findings of a  
386 down-regulation of ISG15 and up-regulation of p53 in PANC-1R cells. In contrast, another  
387 study has shown that the activation of the STAT1 pathway and downstream interferon-  
388 stimulated genes contributes to platinum drug resistance in human ovarian cancer cells (32).

389 It is notable that the expression of MARCKS was upregulated at both the mRNA and  
390 protein levels in PANC-1 R cells (Figs. 6A-C). MARCKS is a substrate of protein kinase C  
391 that plays a regulatory role in various cellular functions, such as actin cytoskeleton, cell  
392 migration, and cell cycles (23), which had not been previously identified to be involved in

393 oxaliplatin resistance. Recent studies have shown that MARCKS regulates intracellular  
394 phosphatidylinositol 4, 5-bisphosphate (PIP2) levels and thereby activating PI3K/AKT  
395 signalling (33-35). In addition, MARCKS knockdown reduces phosphorylation of PI3K and  
396 AKT in non-small-cell lung cancer (NSCLC) cells (36) and renal cell carcinoma (RCC) (21).  
397 In the present study, we show an increase in the levels of AKT phosphorylation (Ser473 and  
398 Thr308) in PANC-1R cells. (Fig. 6C). Since activation of the PI3K/AKT signalling pathway  
399 contributes to oxaliplatin resistance in hepatocellular carcinoma (37), colon cancer (38), and  
400 cholangiocarcinoma cells (39), it is possible that oxaliplatin resistance was acquired by  
401 activation of MARCKS and its downstream AKT signalling in pancreatic cancer cells.

402 WLS is a transmembrane protein that regulates tracking and secretion of Wnt  
403 signalling molecules (40). Secreted Wnt ligands bind to Frizzled receptors and LRP 5/6 co-  
404 receptors, resulting in the activation of Wnt/ $\beta$ -catenin signalling pathway (40, 41). Wnt/ $\beta$ -  
405 catenin signalling plays an important role in the cellular and developmental process and is  
406 aberrantly activated in various types of cancer (41-43). Several previous studies demonstrated  
407 the association of the Wnt/ $\beta$ -catenin pathway with chemoresistance in cancer cells (44-46).  
408 Kukcinaviciute et al. have reported the up-regulation of the Wnt pathway in oxaliplatin-  
409 resistance colorectal cancer cells HCT116 (44). Our proteomic results have shown the up-  
410 regulation of WLS in PANC-1 R cells, and it was confirmed by qRT-PCR and Western blot  
411 (Figs. 6D-F). We also observed the overexpression of  $\beta$ -catenin and its target gene cyclin D1  
412 in PANC-1R cells by Western blot (Fig. 6F), which indicates the activation of the Wnt/ $\beta$ -  
413 catenin pathway in oxaliplatin resistant cells, compared to sensitive cells. These results  
414 suggested that activation of Wnt/ $\beta$ -catenin signalling might lead to oxaliplatin resistance in  
415 pancreatic cancer cells. Furthermore, we demonstrated that dual suppression of MARCKS  
416 and WLS showed a synergistic effect on increasing oxaliplatin sensitivity of PANC-1 R cells

417 (Fig. 7).

418 In conclusion, the present study revealed the multifactorial mechanisms involved in  
419 oxaliplatin resistance in pancreatic cancer cells by performing a SILAC-based quantitative  
420 proteomic profiling. Moreover, functional studies demonstrated that up-regulation of  
421 MARCKS (Akt signalling) and WLS (Wnt/ $\beta$ -catenin signalling) contributes to the oxaliplatin  
422 resistance (Fig. 8). Further investigation is required to elucidate detailed mechanisms, which  
423 will help to develop new therapeutic strategies for overcoming oxaliplatin resistance in the  
424 treatment of pancreatic cancer.

425

#### 426 **Author contributions**

427 H.H.J. and D.K. designed the study. D.K. and H.H.J. wrote the manuscript with help from all  
428 authors. E.-K.K. and M.-J.S. performed the cell culture and biological validation experiments  
429 under the supervision of H.H.J. Y.E.K. performed proteomic experiments and bioinformatics  
430 analysis under the supervision of T.-Y.K. and D.K.

431

#### 432 **Acknowledgements**

433 This research was supported by the Technology Innovation Program (20009350,  
434 Establishment of the measurement standards for toxicity and drug metabolism based on  
435 human stem cell-derived organoid models) funded by the Ministry of Trade, Industry &  
436 Energy (MOTIE, Korea). This research was also supported, in part, by a project of the Korea  
437 Research Institute of Standards and Science (KRISS) under the project title "Establishment  
438 for Metrology in Bioanalysis" (GP2020-0003-05).

## 439 **Conflicts of interest**

440 The authors declare no conflicts of interest.

441

## 442 **Data availability**

443 Excel file containing the analyzed data are provided in Supplementary Information. The

444 datasets generated via nLC-ESI-MS/MS analyses in this study are available in PRIDE,

445 accession number: PXD021251. <https://www.ebi.ac.uk/pride>.

446

## 447 **References**

448 1. Siegel, R. L., Miller, K. D., and Jemal, A. (2018) Cancer statistics, 2018. *CA Cancer J Clin* 68,

449 7-30

450 2. Paul, E. O., and Kenneth, P. O. (2013) Pancreatic cancer: why is it so hard to treat? *Therap*

451 *Adv Gastroenterol* 6, 321–337

452 3. Sheikh, R., Walsh, N., Clynes, M., O'Connor, R., and McDermott, R. (2010) Challenges of

453 drug resistance in the management of pancreatic cancer. *Expert Rev Anticancer Ther* 10, 1647-1661

454 4. Comella, P., Casaretti, R., Sandomenico, C., Avallone, A., and Franco, L. (2009) Role of

455 oxaliplatin in the treatment of colorectal cancer. *Ther Clin Risk Manag* 5, 229-238

456 5. Inadomi, K., Kusaba, H., Matsushita, Y., Tanaka, R., Mitsugi, K., Arimizu, K., Hirano, G.,

457 Makiyama, A., Ohmura, H., Uchino, K., Hanamura, F., Shibata, Y., Kuwayama, M., Esaki, T., Takayoshi,

458 K., Arita, S., Ariyama, H., Akashi, K., and Baba, E. (2017) Efficacy and Safety Analysis of Oxaliplatin-

459 based Chemotherapy for Advanced Gastric Cancer. *Anticancer Res* 37, 2663-2671

460 6. Neoptolemos, J. P., Kleeff, J., Michl, P., Costello, E., Greenhalf, W., and Palmer, D. H. (2018)

461 Therapeutic developments in pancreatic cancer: current and future perspectives. *Nat Rev Gastroenterol*

462 *Hepatol* 15, 333-348

- 463 7. Saung, M. T., and Zheng, L. (2017) Current Standards of Chemotherapy for Pancreatic Cancer.  
464 *Clin Ther* 39, 2125-2134
- 465 8. Alcindor, T., and Beauger, N. (2011) Oxaliplatin: a review in the era of molecularly targeted  
466 therapy. *Curr Oncol* 18, 18-25
- 467 9. Seetharam, R., Sood, A., and Goel, S. (2009) Oxaliplatin: pre-clinical perspectives on the  
468 mechanisms of action, response and resistance. *Ecancermedicalscience* 3, 153
- 469 10. Martinez-Balibrea, E., Martinez-Cardus, A., Gines, A., Ruiz de Porras, V., Moutinho, C.,  
470 Layos, L., Manzano, J. L., Buges, C., Bystrup, S., Esteller, M., and Abad, A. (2015) Tumor-Related  
471 Molecular Mechanisms of Oxaliplatin Resistance. *Mol Cancer Ther* 14, 1767-1776
- 472 11. Rakitina, T. V., Vasilevskaya, I. A., and O'Dwyer, P. J. (2003) Additive interaction of  
473 oxaliplatin and 17-allylamino-17-demethoxygeldanamycin in colon cancer cell lines results from  
474 inhibition of nuclear factor kappaB signaling. *Cancer Res* 63, 8600-8605
- 475 12. Martin, L. P., Hamilton, T. C., and Schilder, R. J. (2008) Platinum resistance: the role of DNA  
476 repair pathways. *Clin Cancer Res* 14, 1291-1295
- 477 13. Li, X. H., Li, C., and Xiao, Z. Q. (2011) Proteomics for identifying mechanisms and  
478 biomarkers of drug resistance in cancer. *J Proteomics* 74, 2642-2649
- 479 14. An, Y., Zhou, L., Huang, Z., Nice, E. C., Zhang, H., and Huang, C. (2019) Molecular insights  
480 into cancer drug resistance from a proteomics perspective. *Expert Rev Proteomics* 16, 413-429
- 481 15. Martinez-Balibrea, E., Plasencia, C., Gines, A., Martinez-Cardus, A., Musulen, E., Aguilera,  
482 R., Manzano, J. L., Neamati, N., and Abad, A. (2009) A proteomic approach links decreased pyruvate  
483 kinase M2 expression to oxaliplatin resistance in patients with colorectal cancer and in human cell lines.  
484 *Mol Cancer Ther* 8, 771-778
- 485 16. Kang, D., Nam, H., Kim, Y. S., and Moon, M. H. (2005) Dual-purpose sample trap for on-line  
486 strong cation-exchange chromatography/reversed-phase liquid chromatography/tandem mass  
487 spectrometry for shotgun proteomics. Application to the human Jurkat T-cell proteome. *J Chromatogr*  
488 *A* 1070, 193-200

- 489 17. Cox, J., and Mann, M. (2008) MaxQuant enables high peptide identification rates,  
490 individualized p.p.b.-range mass accuracies and proteome-wide protein quantification. *Nat Biotechnol*  
491 26, 1367-1372
- 492 18. Tyanova, S., Temu, T., Sinitcyn, P., Carlson, A., Hein, M. Y., Geiger, T., Mann, M., and Cox,  
493 J. (2016) The Perseus computational platform for comprehensive analysis of (prote)omics data. *Nat*  
494 *Methods* 13, 731-740
- 495 19. Yu, G., and He, Q. Y. (2016) ReactomePA: an R/Bioconductor package for reactome pathway  
496 analysis and visualization. *Mol Biosyst* 12, 477-479
- 497 20. Livak, K. J., and Schmittgen, T. D. (2001) Analysis of relative gene expression data using real-  
498 time quantitative PCR and the 2(-Delta Delta C(T)) Method. *Methods* 25, 402-408
- 499 21. Chen, C. H., Fong, L. W. R., Yu, E., Wu, R., Trott, J. F., and Weiss, R. H. (2017) Upregulation  
500 of MARCKS in kidney cancer and its potential as a therapeutic target. *Oncogene* 36, 3588-3598
- 501 22. Chen, C. H., Thai, P., Yoneda, K., Adler, K. B., Yang, P. C., and Wu, R. (2014) A peptide that  
502 inhibits function of Myristoylated Alanine-Rich C Kinase Substrate (MARCKS) reduces lung cancer  
503 metastasis. *Oncogene* 33, 3696-3706
- 504 23. Fong, L. W. R., Yang, D. C., and Chen, C. H. (2017) Myristoylated alanine-rich C kinase  
505 substrate (MARCKS): a multirole signaling protein in cancers. *Cancer Metastasis Rev* 36, 737-747
- 506 24. Glaeser, K., Urban, M., Fenech, E., Voloshanenko, O., Kranz, D., Lari, F., Christianson, J. C.,  
507 and Boutros, M. (2018) ERAD-dependent control of the Wnt secretory factor Evi. *EMBO J* 37
- 508 25. Yang, P. T., Anastas, J. N., Toroni, R. A., Shinohara, M. M., Goodson, J. M., Bosserhoff, A. K.,  
509 Chien, A. J., and Moon, R. T. (2012) WLS inhibits melanoma cell proliferation through the beta-catenin  
510 signalling pathway and induces spontaneous metastasis. *EMBO Mol Med* 4, 1294-1307
- 511 26. Adell, T., Salo, E., Boutros, M., and Bartscherer, K. (2009) Smed-Evi/Wntless is required for  
512 beta-catenin-dependent and -independent processes during planarian regeneration. *Development* 136,  
513 905-910
- 514 27. Vlad-Fiegen, A., Langerak, A., Eberth, S., and Muller, O. (2012) The Wnt pathway destabilizes

- 515 adherens junctions and promotes cell migration via beta-catenin and its target gene cyclin D1. *FEBS*  
516 *Open Bio* 2, 26-31
- 517 28. Shtutman, M., Zhurinsky, J., Simcha, I., Albanese, C., D'Amico, M., Pestell, R., and Ben-Ze'ev,  
518 A. (1999) The cyclin D1 gene is a target of the beta-catenin/LEF-1 pathway. *Proc Natl Acad Sci U S A*  
519 96, 5522-5527
- 520 29. Manic, S., Gatti, L., Carenini, N., Fumagalli, G., Zunino, F., and Perego, P. (2003) Mechanisms  
521 controlling sensitivity to platinum complexes: role of p53 and DNA mismatch repair. *Curr Cancer Drug*  
522 *Targets* 3, 21-29
- 523 30. Srinivas, U. S., Tan, B. W. Q., Vellayappan, B. A., and Jeyasekharan, A. D. (2019) ROS and  
524 the DNA damage response in cancer. *Redox Biol* 25, 101084
- 525 31. Huo, Y., Zong, Z., Wang, Q., Zhang, Z., and Deng, H. (2017) ISG15 silencing increases  
526 cisplatin resistance via activating p53-mediated cell DNA repair. *Oncotarget* 8, 107452-107461
- 527 32. Roberts, D., Schick, J., Conway, S., Biade, S., Laub, P. B., Stevenson, J. P., Hamilton, T. C.,  
528 O'Dwyer, P. J., and Johnson, S. W. (2005) Identification of genes associated with platinum drug  
529 sensitivity and resistance in human ovarian cancer cells. *Br J Cancer* 92, 1149-1158
- 530 33. Chen, C. H., Statt, S., Chiu, C. L., Thai, P., Arif, M., Adler, K. B., and Wu, R. (2014) Targeting  
531 myristoylated alanine-rich C kinase substrate phosphorylation site domain in lung cancer. Mechanisms  
532 and therapeutic implications. *Am J Respir Crit Care Med* 190, 1127-1138
- 533 34. Hanada, S., Kakehashi, A., Nishiyama, N., Wei, M., Yamano, S., Chung, K., Komatsu, H.,  
534 Inoue, H., Suehiro, S., and Wanibuchi, H. (2013) Myristoylated alanine-rich C-kinase substrate as a  
535 prognostic biomarker in human primary lung squamous cell carcinoma. *Cancer Biomark* 13, 289-298
- 536 35. Ziembra, B., Burke, J., Masson, G., Williams, R., and Falke, J. (2016) Regulation of PI3K by  
537 PKC and MARCKS: Single-Molecule Analysis of a Reconstituted Signaling Pathway. *Biophys J* 110,  
538 1811-1825
- 539 36. Chen, C. H., Thai, P., Yoneda, K., Adler, K. B., Yang, P. C., and Wu, R. (2014) A peptide that  
540 inhibits function of Myristoylated Alanine-Rich C Kinase Substrate (MARCKS) reduces lung cancer

- 541 metastasis. *Oncogene* 33, 3696-3706
- 542 37. Xiu, P., Dong, X., Dong, X., Xu, Z., Zhu, H., Liu, F., Wei, Z., Zhai, B., Kanwar, J. R., Jiang,  
543 H., Li, J., and Sun, X. (2013) Secretory clusterin contributes to oxaliplatin resistance by activating Akt  
544 pathway in hepatocellular carcinoma. *Cancer Sci* 104, 375-382
- 545 38. Chen, J., Huang, X. F., Qiao, L., and Katsifis, A. (2011) Insulin caused drug resistance to  
546 oxaliplatin in colon cancer cell line HT29. *J Gastrointest Oncol* 2, 27-33
- 547 39. Leelawat, K., Narong, S., Udomchaiprasertkul, W., Leelawat, S., and Tungpradubkul, S. (2009)  
548 Inhibition of PI3K increases oxaliplatin sensitivity in cholangiocarcinoma cells. *Cancer Cell Int* 9, 3
- 549 40. Das, S., Yu, S., Sakamori, R., Stypulkowski, E., and Gao, N. (2012) Wntless in Wnt secretion:  
550 molecular, cellular and genetic aspects. *Front Biol (Beijing)* 7, 587-593
- 551 41. Zhan, T., Rindtorff, N., and Boutros, M. (2017) Wnt signaling in cancer. *Oncogene* 36, 1461-  
552 1473
- 553 42. Polakis, P. (2007) The many ways of Wnt in cancer. *Curr Opin Genet Dev* 17, 45-51
- 554 43. Barker, N., and Clevers, H. (2006) Mining the Wnt pathway for cancer therapeutics. *Nat Rev*  
555 *Drug Discov* 5, 997-1014
- 556 44. Kukcinaviciute, E., Jonusiene, V., Sasnauskiene, A., Dabkeviciene, D., Eidenaitė, E., and  
557 Laurinavicius, A. (2018) Significance of Notch and Wnt signaling for chemoresistance of colorectal  
558 cancer cells HCT116. *J Cell Biochem* 119, 5913-5920
- 559 45. Chikazawa, N., Tanaka, H., Tasaka, T., Nakamura, M., Tanaka, M., Onishi, H., and Katano, M.  
560 (2010) Inhibition of Wnt signaling pathway decreases chemotherapy-resistant side-population colon  
561 cancer cells. *Anticancer Res* 30, 2041-2048
- 562 46. Cui, J., Jiang, W., Wang, S., Wang, L., and Xie, K. (2012) Role of Wnt/beta-catenin signaling  
563 in drug resistance of pancreatic cancer. *Curr Pharm Des* 18, 2464-2471
- 564
- 565



566 **Figures and Figure legends**

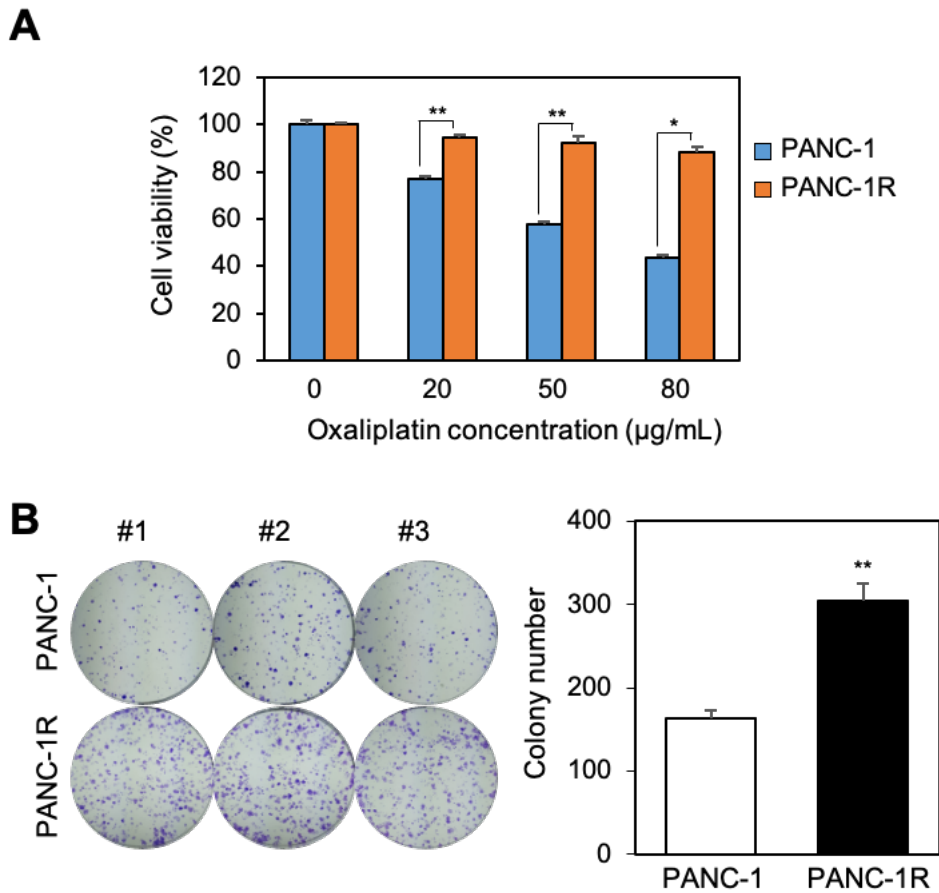

567

568 **Figure 1. Establishment of oxaliplatin-resistant pancreatic cancer cell line.** (A) Cellular

569 viability was assayed by Ez-cytox on PANC-1 and PANC-1R with oxaliplatin for 2 days. (B)

570 The colony formation assays were performed on PANC-1 and PANC-1R, respectively.

571 Representative pictures for the formation of the colony are shown. Counting of colony

572 numbers is shown. Three independent experiments were performed in triplicates. \* $p < 0.05$ ,

573 \*\* $p < 0.01$ .

574

575

576

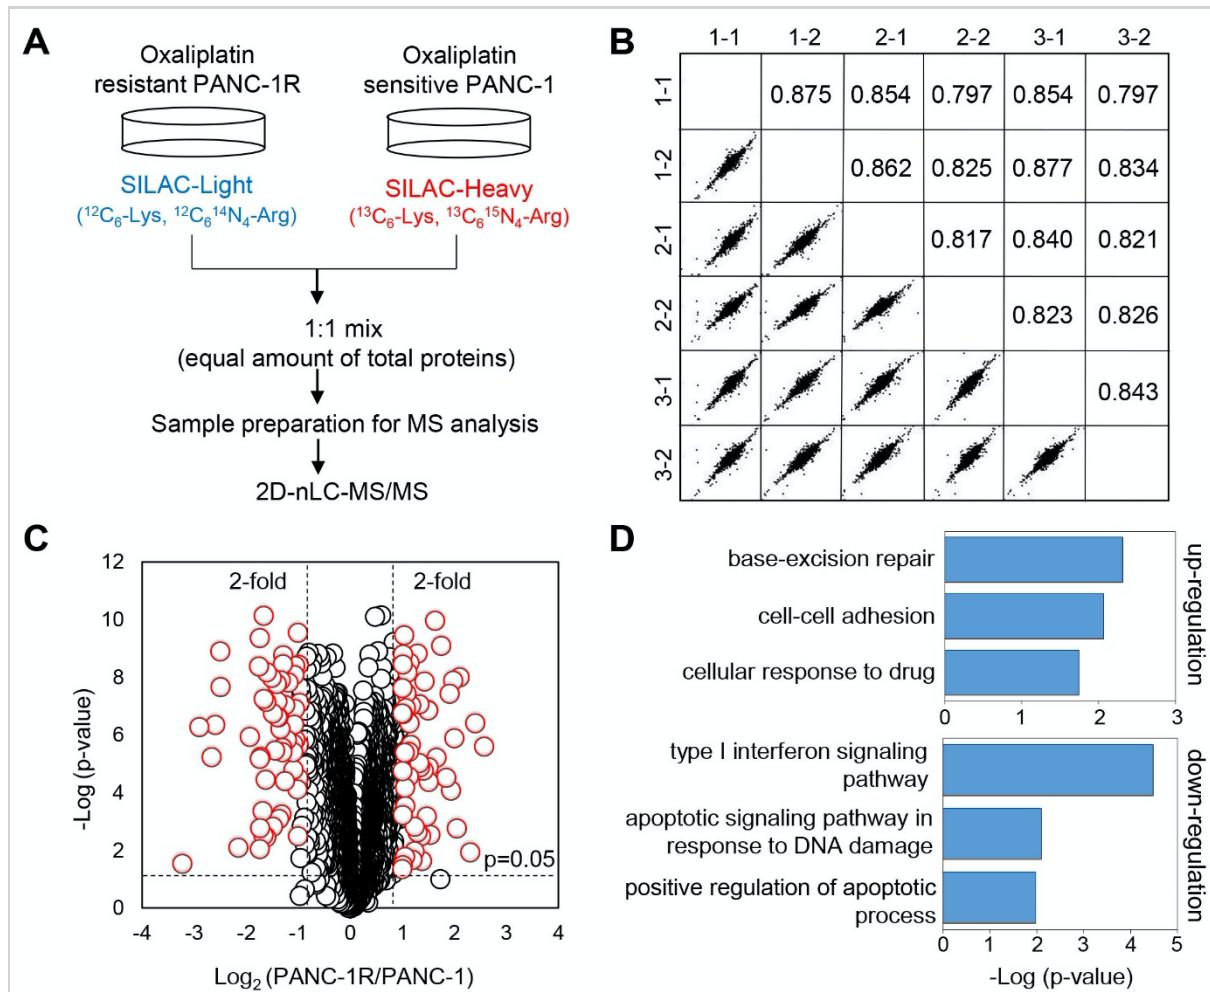

577

578

579 **Figure 2. Proteomic comparison of oxaliplatin sensitive and resistant PANC-1 cells. (A)**

580 Proteomic workflow for SILAC labeling and LC-MS/MS (B) Multiple scatter plots

581 demonstrating reproducibility between the biological and technical replicates. Represented

582 values are Pearson correlation coefficients. (C) Volcano plot showing the  $\log_2$  fold-change

583 and significance ( $-\log_{10}$  p-value) of the proteome dataset. The cut-off values of fold-changes

584 and significance is indicated with a dashed line. Red dots represent significantly changed

585 proteins according to the p-value and fold-change cut-off values. (D) DAVID Gene Ontology

586 enrichment analysis of up-/down-regulated proteins by biological process. PANC-1R,

587 oxaliplatin resistant PANC-1 cells.

588

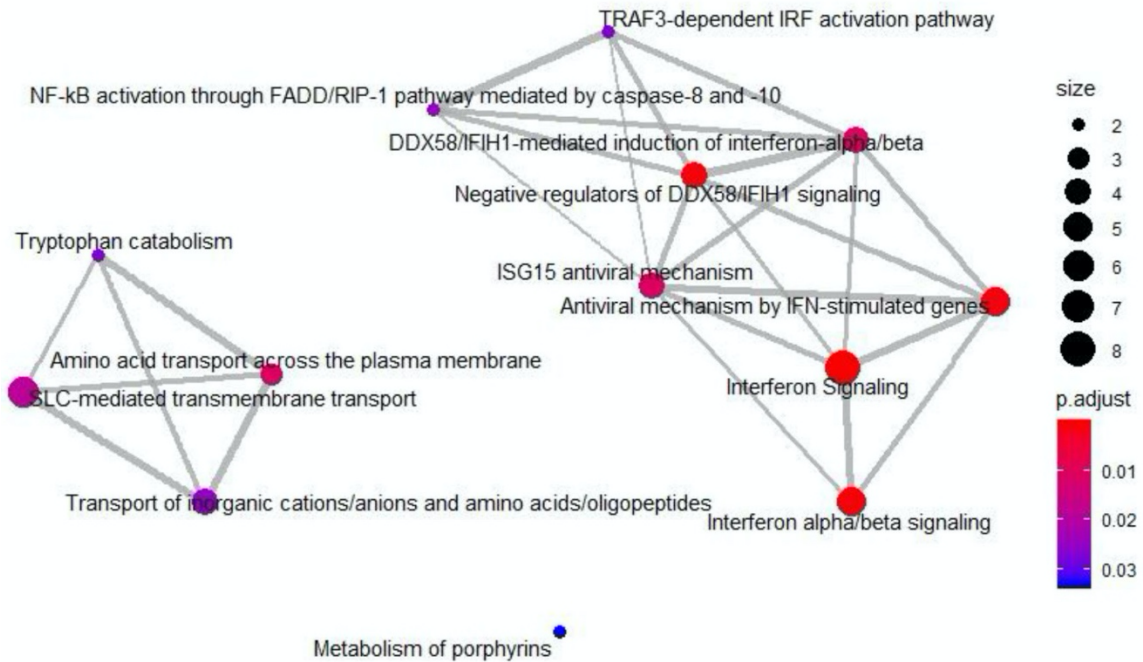

589

590

591 **Figure 3. Reactome pathway enrichment map for down-regulated proteins in oxaliplatin**

592 **resistant PANC-1 cells.** The node color indicates significance of the reactome pathway and

593 the node size represents the number of genes in the reactome pathway.

594

595

596

597

598

599

600

601

602

603

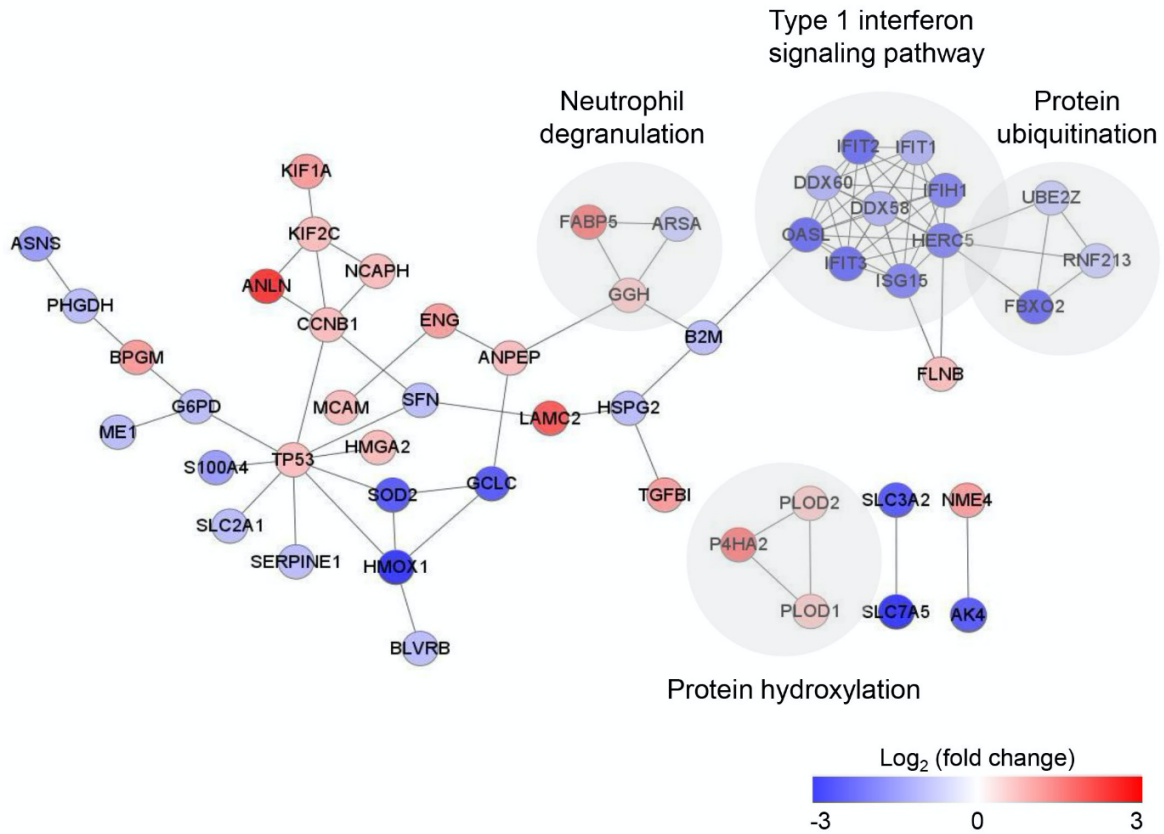

604

605

606 **Figure 4. Protein-protein interaction (PPI) analysis of significantly changed proteins in**

607 **oxaliplatin resistant PANC-1 cells.** The network was mapped using the STRING database

608 and visualized by Cytoscape 3.7.2. Red nodes indicate up-regulation and blue nodes indicate

609 down-regulation.

610

611

612

613

614

615

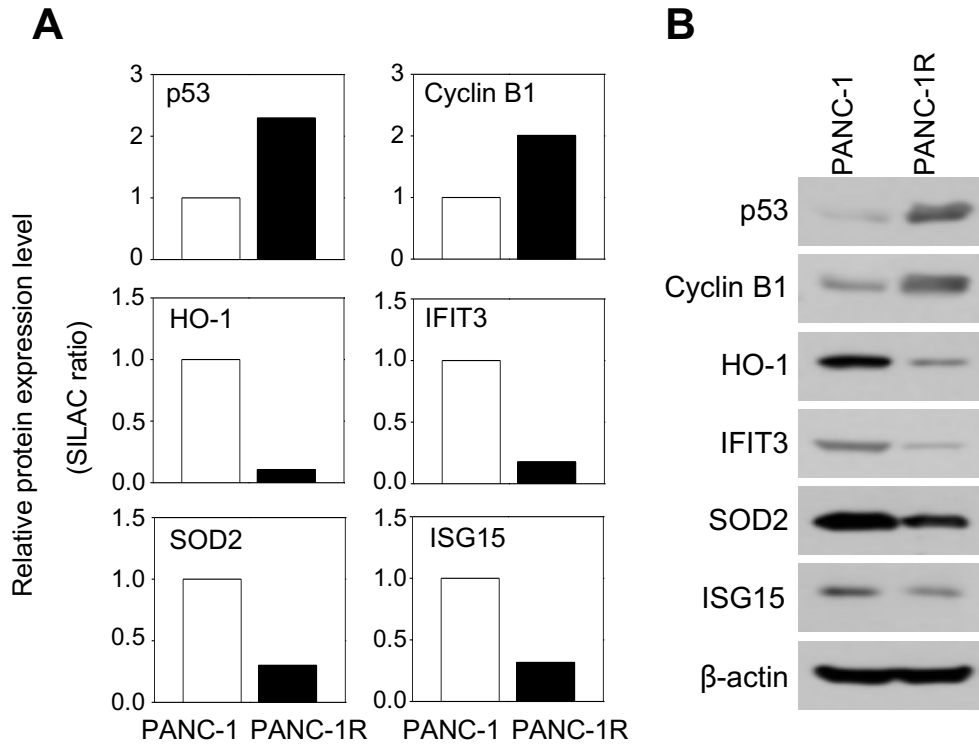

616

617

618 **Figure 5. Validation of SILAC data by Western blot analysis.** (A) Relative protein  
619 expression level of selected proteins (p53, Cyclin B1, SOD2, IFIT3, ISG15 and HO-1) from  
620 SILAC data. Protein expression levels were normalized to oxaliplatin sensitive PANC-1 cells.  
621 (B) Validation of selected proteins (p53, Cyclin B1, SOD2, IFIT3, ISG15 and HO-1) in both  
622 oxaliplatin sensitive and resistant PANC-1 cells by Western blot. ACTB was used as a  
623 loading control.

624

625

626

627

628

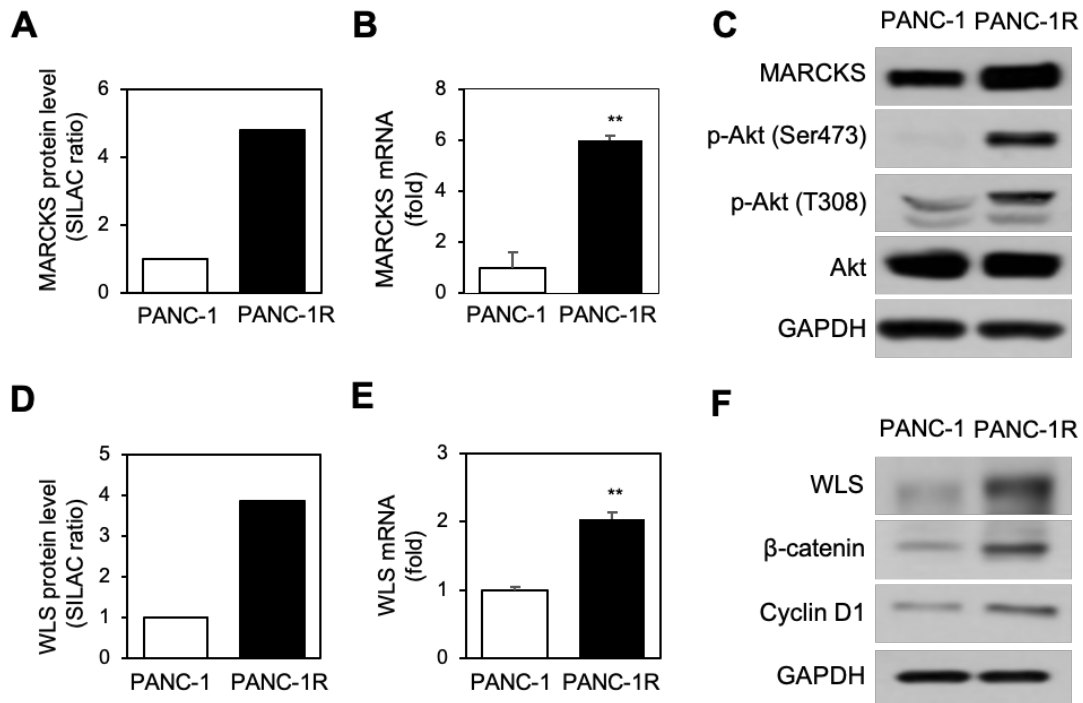

629

630

631 **Figure 6. MARCKS- or WLS-mediated downstream signaling is activated in PANC-1R**

632 **cells.** (A) The SILAC ratio of MARCKS was increased in PANC-1R cells. (B) The

633 quantitative level of MARCKS mRNA by qRT-PCR was higher in PANC-1R cells. Three

634 independent experiments were performed in triplicates. (C) The protein level of MARCKS,

635 phosphor-Akt (Ser473 or Thr308), and total Akt was determined by Western blotting.

636 GAPDH was the loading control. (D) The SILAC ratio of WLS was increased in PANC-1R

637 cells. (E) The level of WLS mRNA by qRT-PCR was higher in PANC-1R cells. Three

638 independent experiments were performed in triplicate. (F) The protein level of WLS, β-

639 catenin, and cyclin D1 was determined by Western blotting. GAPDH was loading control.

640 \*\**p* < 0.01.

641

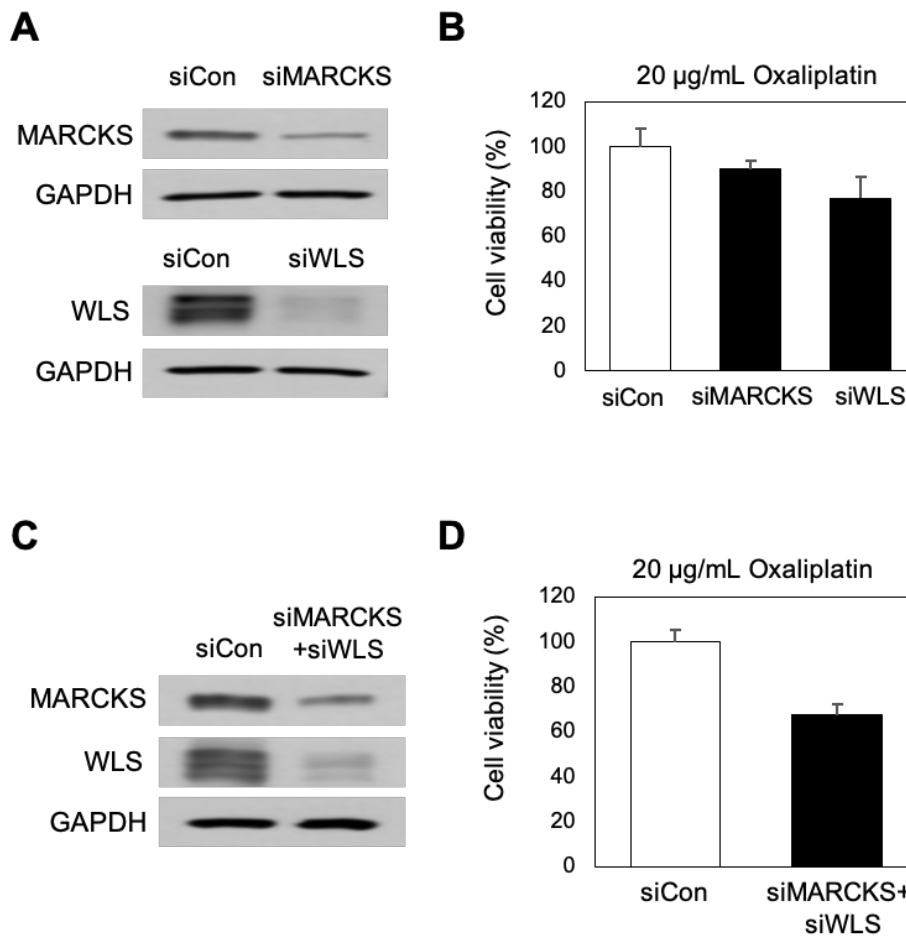

642

643 **Figure 7. The inhibition of MARCKS and WLS induced PANC-1R cells to be sensitive**

644 **to oxaliplatin.** (A) The level of MARCKS or WLS in PANC-1R cell with the treatment of

645 siMARCKS or siWLS was obtained by Western blotting. (B) The cell viability to oxaliplatin

646 was analyzed by Ex-cytox in PANC-1R with knockdown of MARCKS or WLS. (C) The

647 levels of MARCKS and WLS in PANC-1R cells treated with both siMARCKS and siWLS

648 were obtained by Western blotting. (D) The cell viability to oxaliplatin was analyzed by Ex-

649 cytox in PANC-1R cells treated with both siMARCKS and siWLS. **\*\* $p < 0.01$ .**

650

651

652

653

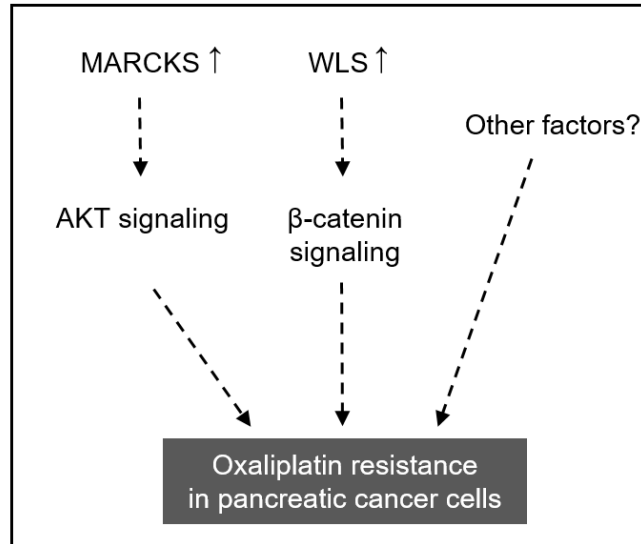

654

655 **Figure 8. Schematic model of oxaliplatin resistance in pancreatic cancer cells**

656
